# Supplementary material for: The contribution of Earth observation technologies to the reporting obligations of the Habitats Directive and Natura 2000 network in a protected wetland
Source: PeerJ journal article supplement (doi:10.7717/peerj.4540), 2018-03-21
Supplement: Appendix_S1.pdf [file Appendix_S1.pdf]

## The contribution of Earth observation technologies to the reporting obligations of the Habitats Directive and Natura 2000 network in a protected wetland

Adrián Regos<sup>1,2</sup>, Jesús Domínguez<sup>2</sup>

### Appendix S1. Dynamics of the embryonic shifting dune.

This appendix shows how the embryonic shifting dune ('mobile dune'; 2110 habitat code) was moved since 2004 to 2014. We digitized the 'mobile dune' from aerial photography available for year 2004, 2008, 2010 y 2014. A shift of 66.5 meters over the last 10 years was estimated (Fig. S1).

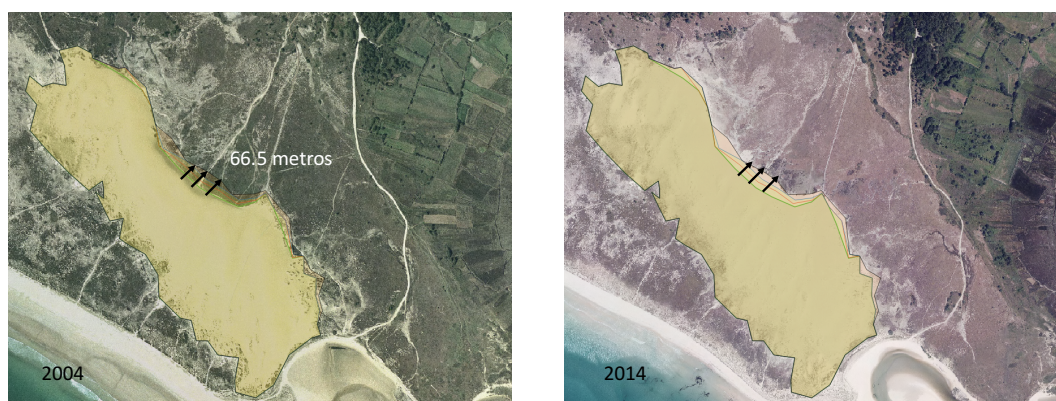

**Fig. S2.** Shape of the 'mobile dune' manually digitized from the aerial photography available for year 2004 (light green line), 2008 (red line), 2010 (dark green line) y 2014 (black line).
