# Supplementary material for: The contribution of Earth observation technologies to the reporting obligations of the Habitats Directive and Natura 2000 network in a protected wetland
Source: PeerJ. 2018 Mar 21;6:e4540. doi: 10.7717/peerj.4540 (PMC5866716; doi:10.7717/peerj.4540)
Supplement: Dataset S1 — Coordinates X and Y refer to each vertex of the polygon. [file peerj-06-4540-s002.xlsx]

## Sheet: 2003 - Ref.Sys. WGS84 29 North
	Coord_X	Coord_Y	Order	Habitat Class	data
1	495892	4.71409e+06	1	Sand dunes	Training
2	495976	4.71407e+06	2	Sand dunes	Training
3	495976	4.71403e+06	3	Sand dunes	Training
4	495915	4.71402e+06	4	Sand dunes	Training
5	495855	4.71404e+06	5	Sand dunes	Training
6	495892	4.71409e+06	6	Sand dunes	Training
7	496106	4.7139e+06	1	Sand dunes	Training
8	496173	4.71387e+06	2	Sand dunes	Training
9	496173	4.71385e+06	3	Sand dunes	Training
10	496173	4.71382e+06	4	Sand dunes	Training
11	496123	4.7138e+06	5	Sand dunes	Training
12	496079	4.7138e+06	6	Sand dunes	Training
13	496079	4.71387e+06	7	Sand dunes	Training
14	496106	4.7139e+06	8	Sand dunes	Training
15	496349	4.71321e+06	1	Tidal areas	Training
16	496370	4.71318e+06	2	Tidal areas	Training
17	496365	4.71316e+06	3	Tidal areas	Training
18	496359	4.71316e+06	4	Tidal areas	Training
19	496339	4.71317e+06	5	Tidal areas	Training
20	496330	4.71319e+06	6	Tidal areas	Training
21	496349	4.71321e+06	7	Tidal areas	Training
22	495728	4.71434e+06	1	Sea dunes	Training
23	495766	4.71432e+06	2	Sea dunes	Training
24	495766	4.7143e+06	3	Sea dunes	Training
25	495759	4.7143e+06	4	Sea dunes	Training
26	495734	4.7143e+06	5	Sea dunes	Training
27	495691	4.7143e+06	6	Sea dunes	Training
28	495728	4.71434e+06	7	Sea dunes	Training
29	496110	4.71426e+06	1	Forest	Training
30	496181	4.71431e+06	2	Forest	Training
31	496192	4.71429e+06	3	Forest	Training
32	496192	4.71425e+06	4	Forest	Training
33	496185	4.71421e+06	5	Forest	Training
34	496169	4.7142e+06	6	Forest	Training
35	496110	4.71421e+06	7	Forest	Training
36	496110	4.71426e+06	8	Forest	Training
37	496372	4.71392e+06	1	Forest	Training
38	496456	4.71386e+06	2	Forest	Training
39	496443	4.71382e+06	3	Forest	Training
40	496419	4.71382e+06	4	Forest	Training
41	496360	4.71382e+06	5	Forest	Training
42	496359	4.71388e+06	6	Forest	Training
43	496372	4.71392e+06	7	Forest	Training
44	497082	4.71253e+06	1	Forest	Training
45	497155	4.71249e+06	2	Forest	Training
46	497155	4.71246e+06	3	Forest	Training
47	497152	4.71241e+06	4	Forest	Training
48	497134	4.71241e+06	5	Forest	Training
49	497075	4.71241e+06	6	Forest	Training
50	497055	4.71243e+06	7	Forest	Training
51	497049	4.71246e+06	8	Forest	Training
52	497082	4.71253e+06	9	Forest	Training
53	495636	4.71404e+06	1	Forest	Training
54	495707	4.714e+06	2	Forest	Training
55	495742	4.71395e+06	3	Forest	Training
56	495668	4.71398e+06	4	Forest	Training
57	495625	4.71401e+06	5	Forest	Training
58	495636	4.71404e+06	6	Forest	Training
59	497905	4.7099e+06	1	Forest	Training
60	497936	4.70989e+06	2	Forest	Training
61	497928	4.70987e+06	3	Forest	Training
62	497920	4.70987e+06	4	Forest	Training
63	497901	4.70987e+06	5	Forest	Training
64	497894	4.70988e+06	6	Forest	Training
65	497894	4.70989e+06	7	Forest	Training
66	497905	4.7099e+06	8	Forest	Training
67	497869	4.70993e+06	1	Forest	Training
68	497889	4.70992e+06	2	Forest	Training
69	497885	4.70991e+06	3	Forest	Training
70	497877	4.70989e+06	4	Forest	Training
71	497860	4.70989e+06	5	Forest	Training
72	497858	4.70989e+06	6	Forest	Training
73	497860	4.70992e+06	7	Forest	Training
74	497869	4.70993e+06	8	Forest	Training
75	497843	4.70983e+06	1	Sand dunes	Training
76	497842	4.70986e+06	2	Sand dunes	Training
77	497877	4.70985e+06	3	Sand dunes	Training
78	497901	4.70984e+06	4	Sand dunes	Training
79	497910	4.70983e+06	5	Sand dunes	Training
80	497843	4.70983e+06	6	Sand dunes	Training
81	498032	4.70988e+06	1	Sand dunes	Training
82	498067	4.70986e+06	2	Sand dunes	Training
83	498051	4.70985e+06	3	Sand dunes	Training
84	498001	4.70985e+06	4	Sand dunes	Training
85	497989	4.70988e+06	5	Sand dunes	Training
86	498032	4.70988e+06	6	Sand dunes	Training
87	496797	4.71346e+06	1	Sea dunes	Training
88	496769	4.71341e+06	2	Sea dunes	Training
89	496756	4.71337e+06	3	Sea dunes	Training
90	496694	4.71336e+06	4	Sea dunes	Training
91	496691	4.71341e+06	5	Sea dunes	Training
92	496724	4.71343e+06	6	Sea dunes	Training
93	496743	4.71346e+06	7	Sea dunes	Training
94	496797	4.71346e+06	8	Sea dunes	Training
95	497224	4.71409e+06	1	Sea dunes	Training
96	497228	4.71407e+06	2	Sea dunes	Training
97	497208	4.71406e+06	3	Sea dunes	Training
98	497165	4.71406e+06	4	Sea dunes	Training
99	497154	4.71408e+06	5	Sea dunes	Training
100	497176	4.71409e+06	6	Sea dunes	Training
101	497224	4.71409e+06	7	Sea dunes	Training
102	496952	4.71405e+06	1	Sea dunes	Training
103	496946	4.71398e+06	2	Sea dunes	Training
104	496901	4.71398e+06	3	Sea dunes	Training
105	496860	4.71398e+06	4	Sea dunes	Training
106	496863	4.714e+06	5	Sea dunes	Training
107	496863	4.71402e+06	6	Sea dunes	Training
108	496893	4.71405e+06	7	Sea dunes	Training
109	496952	4.71405e+06	8	Sea dunes	Training
110	497158	4.7134e+06	1	Sea dunes	Training
111	497170	4.71332e+06	2	Sea dunes	Training
112	497136	4.71328e+06	3	Sea dunes	Training
113	497085	4.71329e+06	4	Sea dunes	Training
114	497085	4.71336e+06	5	Sea dunes	Training
115	497158	4.7134e+06	6	Sea dunes	Training
116	497690	4.71371e+06	1	Tidal areas	Training
117	497722	4.71369e+06	2	Tidal areas	Training
118	497699	4.71365e+06	3	Tidal areas	Training
119	497637	4.71365e+06	4	Tidal areas	Training
120	497594	4.71362e+06	5	Tidal areas	Training
121	497548	4.71362e+06	6	Tidal areas	Training
122	497530	4.71362e+06	7	Tidal areas	Training
123	497564	4.71367e+06	8	Tidal areas	Training
124	497601	4.71368e+06	9	Tidal areas	Training
125	497601	4.7137e+06	10	Tidal areas	Training
126	497690	4.71371e+06	11	Tidal areas	Training
127	496486	4.71424e+06	1	Tidal areas	Training
128	496539	4.71424e+06	2	Tidal areas	Training
129	496543	4.71421e+06	3	Tidal areas	Training
130	496598	4.71421e+06	4	Tidal areas	Training
131	496577	4.71416e+06	5	Tidal areas	Training
132	496530	4.71417e+06	6	Tidal areas	Training
133	496520	4.7142e+06	7	Tidal areas	Training
134	496486	4.71424e+06	8	Tidal areas	Training
135	497900	4.71004e+06	1	Tidal areas	Training
136	497982	4.71002e+06	2	Tidal areas	Training
137	497954	4.70999e+06	3	Tidal areas	Training
138	497903	4.70999e+06	4	Tidal areas	Training
139	497900	4.71004e+06	5	Tidal areas	Training
140	498083	4.70999e+06	1	Tidal areas	Training
141	498144	4.70995e+06	2	Tidal areas	Training
142	498104	4.70993e+06	3	Tidal areas	Training
143	498070	4.70996e+06	4	Tidal areas	Training
144	498083	4.70999e+06	5	Tidal areas	Training
145	498141	4.70983e+06	1	Salt marshes	Training
146	498199	4.70982e+06	2	Salt marshes	Training
147	498200	4.70977e+06	3	Salt marshes	Training
148	498141	4.70979e+06	4	Salt marshes	Training
149	498141	4.70983e+06	5	Salt marshes	Training
150	496400	4.71339e+06	1	Salt marshes	Training
151	496434	4.71338e+06	2	Salt marshes	Training
152	496434	4.71326e+06	3	Salt marshes	Training
153	496400	4.71325e+06	4	Salt marshes	Training
154	496400	4.71339e+06	5	Salt marshes	Training
155	498240	4.70979e+06	1	Salt marshes	Training
156	498280	4.70975e+06	2	Salt marshes	Training
157	498247	4.70975e+06	3	Salt marshes	Training
158	498240	4.70979e+06	4	Salt marshes	Training
159	497697	4.71061e+06	1	Grasslands	Training
160	497726	4.71049e+06	2	Grasslands	Training
161	497695	4.71049e+06	3	Grasslands	Training
162	497697	4.71061e+06	4	Grasslands	Training
163	496578	4.71469e+06	1	Grasslands	Training
164	496603	4.71466e+06	2	Grasslands	Training
165	496634	4.71466e+06	3	Grasslands	Training
166	496638	4.7146e+06	4	Grasslands	Training
167	496578	4.7146e+06	5	Grasslands	Training
168	496578	4.71469e+06	6	Grasslands	Training
169	498052	4.71391e+06	1	Reedbed	Training
170	498132	4.71391e+06	2	Reedbed	Training
171	498136	4.71386e+06	3	Reedbed	Training
172	498052	4.71386e+06	4	Reedbed	Training
173	498052	4.71391e+06	5	Reedbed	Training
174	498317	4.71363e+06	1	Reedbed	Training
175	498314	4.71354e+06	2	Reedbed	Training
176	498276	4.71354e+06	3	Reedbed	Training
177	498278	4.71363e+06	4	Reedbed	Training
178	498317	4.71363e+06	5	Reedbed	Training
179	497063	4.71403e+06	1	Reedbed	Training
180	497105	4.71399e+06	2	Reedbed	Training
181	497045	4.71399e+06	3	Reedbed	Training
182	497063	4.71403e+06	4	Reedbed	Training
183	497349	4.7141e+06	1	Tidal areas	Training
184	497349	4.71405e+06	2	Tidal areas	Training
185	497299	4.71405e+06	3	Tidal areas	Training
186	497299	4.7141e+06	4	Tidal areas	Training
187	497349	4.7141e+06	5	Tidal areas	Training
188	496334	4.71409e+06	1	Reedbed	Training
189	496414	4.71397e+06	2	Reedbed	Training
190	496324	4.71397e+06	3	Reedbed	Training
191	496334	4.71409e+06	4	Reedbed	Training
192	497419	4.71149e+06	1	Grasslands	Training
193	497465	4.71141e+06	2	Grasslands	Training
194	497448	4.71135e+06	3	Grasslands	Training
195	497417	4.71141e+06	4	Grasslands	Training
196	497419	4.71149e+06	5	Grasslands	Training
197	496383	4.71353e+06	1	Grasslands	Training
198	496469	4.71353e+06	2	Grasslands	Training
199	496469	4.7135e+06	3	Grasslands	Training
200	496383	4.7135e+06	4	Grasslands	Training
201	496383	4.71353e+06	5	Grasslands	Training
202	496095	4.71333e+06	1	Forest	Training
203	496179	4.71333e+06	2	Forest	Training
204	496178	4.71328e+06	3	Forest	Training
205	496096	4.71328e+06	4	Forest	Training
206	496095	4.71333e+06	5	Forest	Training
207	496551	4.71343e+06	1	Salt marshes	Training
208	496656	4.71339e+06	2	Salt marshes	Training
209	496582	4.71334e+06	3	Salt marshes	Training
210	496551	4.71343e+06	4	Salt marshes	Training
211	498203	4.71338e+06	1	Salt marshes	Training
212	498229	4.71334e+06	2	Salt marshes	Training
213	498189	4.71331e+06	3	Salt marshes	Training
214	498161	4.71335e+06	4	Salt marshes	Training
215	498203	4.71338e+06	5	Salt marshes	Training
216	497146	4.71457e+06	1	Sea dunes	Training
217	497143	4.71454e+06	2	Sea dunes	Training
218	497112	4.71454e+06	3	Sea dunes	Training
219	497112	4.71451e+06	4	Sea dunes	Training
220	497079	4.71451e+06	5	Sea dunes	Training
221	497085	4.71448e+06	6	Sea dunes	Training
222	497028	4.71448e+06	7	Sea dunes	Training
223	497028	4.71451e+06	8	Sea dunes	Training
224	497056	4.71451e+06	9	Sea dunes	Training
225	497056	4.71454e+06	10	Sea dunes	Training
226	497085	4.71454e+06	11	Sea dunes	Training
227	497085	4.71456e+06	12	Sea dunes	Training
228	497146	4.71457e+06	13	Sea dunes	Training
229	496485	4.71463e+06	1	Sand dunes	Training
230	496487	4.71452e+06	2	Sand dunes	Training
231	496432	4.71455e+06	3	Sand dunes	Training
232	496429	4.7146e+06	4	Sand dunes	Training
233	496456	4.7146e+06	5	Sand dunes	Training
234	496458	4.71463e+06	6	Sand dunes	Training
235	496485	4.71463e+06	7	Sand dunes	Training
236	497863	4.71445e+06	1	Tidal areas	Training
237	497865	4.7144e+06	2	Tidal areas	Training
238	497832	4.7144e+06	3	Tidal areas	Training
239	497832	4.71437e+06	4	Tidal areas	Training
240	497811	4.71437e+06	5	Tidal areas	Training
241	497811	4.71445e+06	6	Tidal areas	Training
242	497863	4.71445e+06	7	Tidal areas	Training
243	498061	4.71412e+06	1	Tidal areas	Training
244	498085	4.71405e+06	2	Tidal areas	Training
245	498028	4.71407e+06	3	Tidal areas	Training
246	498061	4.71412e+06	4	Tidal areas	Training
247	498094	4.71343e+06	1	Tidal areas	Training
248	498094	4.71341e+06	2	Tidal areas	Training
249	498036	4.71341e+06	3	Tidal areas	Training
250	498033	4.71337e+06	4	Tidal areas	Training
251	498005	4.71337e+06	5	Tidal areas	Training
252	498005	4.71335e+06	6	Tidal areas	Training
253	497975	4.71335e+06	7	Tidal areas	Training
254	497975	4.7134e+06	8	Tidal areas	Training
255	498005	4.71341e+06	9	Tidal areas	Training
256	498008	4.71344e+06	10	Tidal areas	Training
257	498094	4.71343e+06	11	Tidal areas	Training
258	497719	4.71313e+06	1	Forest	Training
259	497959	4.71312e+06	2	Forest	Training
260	497959	4.71308e+06	3	Forest	Training
261	497719	4.71309e+06	4	Forest	Training
262	497719	4.71313e+06	5	Forest	Training
263	498074	4.71124e+06	1	Forest	Training
264	498074	4.71112e+06	2	Forest	Training
265	498052	4.71112e+06	3	Forest	Training
266	498049	4.71121e+06	4	Forest	Training
267	498052	4.71124e+06	5	Forest	Training
268	498074	4.71124e+06	6	Forest	Training
269	498198	4.71398e+06	1	Forest	Training
270	498226	4.71397e+06	2	Forest	Training
271	498229	4.71386e+06	3	Forest	Training
272	498198	4.71385e+06	4	Forest	Training
273	498198	4.71398e+06	5	Forest	Training
274	498105	4.71373e+06	1	Forest	Training
275	498190	4.71373e+06	2	Forest	Training
276	498193	4.71371e+06	3	Forest	Training
277	498105	4.71371e+06	4	Forest	Training
278	498105	4.71373e+06	5	Forest	Training
279	497992	4.71412e+06	1	Forest	Training
280	498017	4.71412e+06	2	Forest	Training
281	498019	4.71404e+06	3	Forest	Training
282	497986	4.71404e+06	4	Forest	Training
283	497992	4.71412e+06	5	Forest	Training
284	497879	4.70987e+06	1	Tidal areas	Validation
285	497903	4.70987e+06	2	Tidal areas	Validation
286	497896	4.70986e+06	3	Tidal areas	Validation
287	497879	4.70986e+06	4	Tidal areas	Validation
288	497879	4.70987e+06	5	Tidal areas	Validation
289	497845	4.70982e+06	1	Tidal areas	Validation
290	497869	4.70982e+06	2	Tidal areas	Validation
291	497864	4.70981e+06	3	Tidal areas	Validation
292	497843	4.70981e+06	4	Tidal areas	Validation
293	497845	4.70982e+06	5	Tidal areas	Validation
294	496458	4.71328e+06	1	Sea dunes	Validation
295	496541	4.71326e+06	2	Sea dunes	Validation
296	496635	4.71328e+06	3	Sea dunes	Validation
297	496611	4.71323e+06	4	Sea dunes	Validation
298	496558	4.7132e+06	5	Sea dunes	Validation
299	496486	4.71324e+06	6	Sea dunes	Validation
300	496458	4.71328e+06	7	Sea dunes	Validation
301	496183	4.71338e+06	1	Forest	Validation
302	496234	4.71331e+06	2	Forest	Validation
303	496165	4.71328e+06	3	Forest	Validation
304	496144	4.71331e+06	4	Forest	Validation
305	496183	4.71338e+06	5	Forest	Validation
306	495805	4.7142e+06	1	Reedbed	Validation
307	495864	4.71418e+06	2	Reedbed	Validation
308	495862	4.71416e+06	3	Reedbed	Validation
309	495837	4.71415e+06	4	Reedbed	Validation
310	495805	4.71417e+06	5	Reedbed	Validation
311	495805	4.7142e+06	6	Reedbed	Validation
312	495967	4.714e+06	1	Forest	Validation
313	496036	4.71397e+06	2	Forest	Validation
314	496024	4.71394e+06	3	Forest	Validation
315	495963	4.71394e+06	4	Forest	Validation
316	495967	4.714e+06	5	Forest	Validation
317	496161	4.71378e+06	1	Grasslands	Validation
318	496241	4.71379e+06	2	Grasslands	Validation
319	496244	4.71372e+06	3	Grasslands	Validation
320	496163	4.71372e+06	4	Grasslands	Validation
321	496161	4.71378e+06	5	Grasslands	Validation
322	495752	4.71437e+06	1	Salt marshes	Validation
323	495810	4.71434e+06	2	Salt marshes	Validation
324	495754	4.71435e+06	3	Salt marshes	Validation
325	495752	4.71437e+06	4	Salt marshes	Validation
326	496474	4.71303e+06	1	Grasslands	Validation
327	496535	4.713e+06	2	Grasslands	Validation
328	496502	4.71298e+06	3	Grasslands	Validation
329	496474	4.71303e+06	4	Grasslands	Validation
330	496040	4.71444e+06	1	Forest	Validation
331	496096	4.71442e+06	2	Forest	Validation
332	496096	4.71436e+06	3	Forest	Validation
333	496049	4.71435e+06	4	Forest	Validation
334	496040	4.71444e+06	5	Forest	Validation
335	496436	4.71401e+06	1	Tidal areas	Validation
336	496466	4.71392e+06	2	Tidal areas	Validation
337	496419	4.71391e+06	3	Tidal areas	Validation
338	496436	4.71401e+06	4	Tidal areas	Validation
339	496596	4.71379e+06	1	Tidal areas	Validation
340	496658	4.71375e+06	2	Tidal areas	Validation
341	496639	4.71373e+06	3	Tidal areas	Validation
342	496596	4.71373e+06	4	Tidal areas	Validation
343	496596	4.71379e+06	5	Tidal areas	Validation
344	497198	4.71235e+06	1	Sand dunes	Validation
345	497249	4.7123e+06	2	Sand dunes	Validation
346	497249	4.71227e+06	3	Sand dunes	Validation
347	497202	4.71227e+06	4	Sand dunes	Validation
348	497182	4.7123e+06	5	Sand dunes	Validation
349	497198	4.71235e+06	6	Sand dunes	Validation
350	497704	4.71069e+06	1	Sand dunes	Validation
351	497714	4.71064e+06	2	Sand dunes	Validation
352	497688	4.71066e+06	3	Sand dunes	Validation
353	497704	4.71069e+06	4	Sand dunes	Validation
354	498100	4.71047e+06	1	Sand dunes	Validation
355	498147	4.71042e+06	2	Sand dunes	Validation
356	498103	4.71042e+06	3	Sand dunes	Validation
357	498097	4.71044e+06	4	Sand dunes	Validation
358	498100	4.71047e+06	5	Sand dunes	Validation
359	498066	4.71087e+06	1	Sand dunes	Validation
360	498095	4.71084e+06	2	Sand dunes	Validation
361	498045	4.71075e+06	3	Sand dunes	Validation
362	498011	4.71077e+06	4	Sand dunes	Validation
363	498066	4.71087e+06	5	Sand dunes	Validation
364	497969	4.71015e+06	1	Sand dunes	Validation
365	498014	4.71017e+06	2	Sand dunes	Validation
366	498003	4.71012e+06	3	Sand dunes	Validation
367	497969	4.71015e+06	4	Sand dunes	Validation
368	497814	4.71234e+06	1	Sea dunes	Validation
369	497834	4.71229e+06	2	Sea dunes	Validation
370	497808	4.71229e+06	3	Sea dunes	Validation
371	497814	4.71234e+06	4	Sea dunes	Validation
372	497793	4.71373e+06	1	Sea dunes	Validation
373	497793	4.71367e+06	2	Sea dunes	Validation
374	497751	4.71367e+06	3	Sea dunes	Validation
375	497751	4.7137e+06	4	Sea dunes	Validation
376	497793	4.71373e+06	5	Sea dunes	Validation
377	498633	4.71393e+06	1	Sea dunes	Validation
378	498706	4.71388e+06	2	Sea dunes	Validation
379	498633	4.71387e+06	3	Sea dunes	Validation
380	498633	4.71393e+06	4	Sea dunes	Validation
381	496907	4.71461e+06	1	Sea dunes	Validation
382	496927	4.71457e+06	2	Sea dunes	Validation
383	496872	4.71451e+06	3	Sea dunes	Validation
384	496872	4.71455e+06	4	Sea dunes	Validation
385	496907	4.71461e+06	5	Sea dunes	Validation
386	496692	4.71474e+06	1	Grasslands	Validation
387	496715	4.71472e+06	2	Grasslands	Validation
388	496680	4.71469e+06	3	Grasslands	Validation
389	496692	4.71474e+06	4	Grasslands	Validation
390	497948	4.71432e+06	1	Grasslands	Validation
391	497969	4.71431e+06	2	Grasslands	Validation
392	497938	4.71426e+06	3	Grasslands	Validation
393	497872	4.71425e+06	4	Grasslands	Validation
394	497865	4.71429e+06	5	Grasslands	Validation
395	497903	4.71429e+06	6	Grasslands	Validation
396	497917	4.71432e+06	7	Grasslands	Validation
397	497948	4.71432e+06	8	Grasslands	Validation
398	497932	4.71295e+06	1	Grasslands	Validation
399	497961	4.71287e+06	2	Grasslands	Validation
400	497926	4.71291e+06	3	Grasslands	Validation
401	497932	4.71295e+06	4	Grasslands	Validation
402	498015	4.71318e+06	1	Grasslands	Validation
403	498060	4.71314e+06	2	Grasslands	Validation
404	497991	4.7131e+06	3	Grasslands	Validation
405	498015	4.71318e+06	4	Grasslands	Validation
406	498203	4.71219e+06	1	Grasslands	Validation
407	498224	4.71215e+06	2	Grasslands	Validation
408	498190	4.71215e+06	3	Grasslands	Validation
409	498203	4.71219e+06	4	Grasslands	Validation
410	497300	4.71417e+06	1	Grasslands	Validation
411	497343	4.71413e+06	2	Grasslands	Validation
412	497278	4.71413e+06	3	Grasslands	Validation
413	497300	4.71417e+06	4	Grasslands	Validation
414	497192	4.71395e+06	1	Grasslands	Validation
415	497216	4.71393e+06	2	Grasslands	Validation
416	497200	4.71389e+06	3	Grasslands	Validation
417	497162	4.71392e+06	4	Grasslands	Validation
418	497192	4.71395e+06	5	Grasslands	Validation
419	497249	4.71374e+06	1	Grasslands	Validation
420	497307	4.71374e+06	2	Grasslands	Validation
421	497217	4.71369e+06	3	Grasslands	Validation
422	497249	4.71374e+06	4	Grasslands	Validation
423	496905	4.71393e+06	1	Grasslands	Validation
424	496949	4.71391e+06	2	Grasslands	Validation
425	496905	4.7139e+06	3	Grasslands	Validation
426	496905	4.71393e+06	4	Grasslands	Validation
427	497341	4.714e+06	1	Forest	Validation
428	497394	4.714e+06	2	Forest	Validation
429	497358	4.71396e+06	3	Forest	Validation
430	497341	4.714e+06	4	Forest	Validation
431	497314	4.71383e+06	1	Forest	Validation
432	497364	4.71378e+06	2	Forest	Validation
433	497301	4.71378e+06	3	Forest	Validation
434	497314	4.71383e+06	4	Forest	Validation
435	498041	4.71001e+06	1	Salt marshes	Validation
436	498054	4.70998e+06	2	Salt marshes	Validation
437	497998	4.70995e+06	3	Salt marshes	Validation
438	497958	4.70997e+06	4	Salt marshes	Validation
439	498041	4.71001e+06	5	Salt marshes	Validation
440	498137	4.70989e+06	1	Salt marshes	Validation
441	498164	4.70989e+06	2	Salt marshes	Validation
442	498168	4.70984e+06	3	Salt marshes	Validation
443	498136	4.70984e+06	4	Salt marshes	Validation
444	498137	4.70989e+06	5	Salt marshes	Validation
445	498213	4.70981e+06	1	Salt marshes	Validation
446	498243	4.70981e+06	2	Salt marshes	Validation
447	498208	4.70976e+06	3	Salt marshes	Validation
448	498213	4.70981e+06	4	Salt marshes	Validation
449	498079	4.70982e+06	1	Salt marshes	Validation
450	498126	4.70981e+06	2	Salt marshes	Validation
451	498123	4.70979e+06	3	Salt marshes	Validation
452	498065	4.70981e+06	4	Salt marshes	Validation
453	498079	4.70982e+06	5	Salt marshes	Validation
454	497979	4.70983e+06	1	Salt marshes	Validation
455	498040	4.7098e+06	2	Salt marshes	Validation
456	497984	4.70981e+06	3	Salt marshes	Validation
457	497979	4.70983e+06	4	Salt marshes	Validation
458	498228	4.70974e+06	1	Salt marshes	Validation
459	498285	4.70974e+06	2	Salt marshes	Validation
460	498235	4.70972e+06	3	Salt marshes	Validation
461	498228	4.70974e+06	4	Salt marshes	Validation
462	497941	4.70986e+06	1	Reedbed	Validation
463	497941	4.70989e+06	2	Reedbed	Validation
464	497978	4.70989e+06	3	Reedbed	Validation
465	497978	4.70987e+06	4	Reedbed	Validation
466	497941	4.70986e+06	5	Reedbed	Validation
467	497941	4.70986e+06	6	Reedbed	Validation
468	497895	4.71229e+06	1	Reedbed	Validation
469	497897	4.71224e+06	2	Reedbed	Validation
470	497863	4.71224e+06	3	Reedbed	Validation
471	497863	4.71221e+06	4	Reedbed	Validation
472	497809	4.7122e+06	5	Reedbed	Validation
473	497809	4.71222e+06	6	Reedbed	Validation
474	497837	4.71222e+06	7	Reedbed	Validation
475	497837	4.71224e+06	8	Reedbed	Validation
476	497837	4.71226e+06	9	Reedbed	Validation
477	497867	4.71226e+06	10	Reedbed	Validation
478	497867	4.71229e+06	11	Reedbed	Validation
479	497895	4.71229e+06	12	Reedbed	Validation
480	497801	4.71313e+06	1	Reedbed	Validation
481	497735	4.71287e+06	2	Reedbed	Validation
482	497679	4.71313e+06	3	Reedbed	Validation
483	497801	4.71313e+06	4	Reedbed	Validation
484	498110	4.71304e+06	1	Reedbed	Validation
485	498164	4.71304e+06	2	Reedbed	Validation
486	498135	4.71296e+06	3	Reedbed	Validation
487	498104	4.71296e+06	4	Reedbed	Validation
488	498103	4.71289e+06	5	Reedbed	Validation
489	498053	4.71289e+06	6	Reedbed	Validation
490	498053	4.71292e+06	7	Reedbed	Validation
491	498110	4.71304e+06	8	Reedbed	Validation
492	498046	4.71346e+06	1	Reedbed	Validation
493	498045	4.71343e+06	2	Reedbed	Validation
494	498076	4.71343e+06	3	Reedbed	Validation
495	498076	4.71341e+06	4	Reedbed	Validation
496	498048	4.71341e+06	5	Reedbed	Validation
497	498048	4.71337e+06	6	Reedbed	Validation
498	498019	4.71337e+06	7	Reedbed	Validation
499	498019	4.71335e+06	8	Reedbed	Validation
500	497988	4.71335e+06	9	Reedbed	Validation
501	497978	4.7134e+06	10	Reedbed	Validation
502	498015	4.7134e+06	11	Reedbed	Validation
503	498015	4.71346e+06	12	Reedbed	Validation
504	498046	4.71346e+06	13	Reedbed	Validation
505	497483	4.71434e+06	1	Tidal areas	Validation
506	497517	4.71433e+06	2	Tidal areas	Validation
507	497509	4.71426e+06	3	Tidal areas	Validation
508	497409	4.71425e+06	4	Tidal areas	Validation
509	497483	4.71434e+06	5	Tidal areas	Validation
510	497016	4.71409e+06	1	Forest	Validation
511	497008	4.71394e+06	2	Forest	Validation
512	496964	4.71394e+06	3	Forest	Validation
513	496979	4.71409e+06	4	Forest	Validation
514	497016	4.71409e+06	5	Forest	Validation
515	496655	4.71451e+06	1	Forest	Validation
516	496684	4.71448e+06	2	Forest	Validation
517	496628	4.71441e+06	3	Forest	Validation
518	496604	4.71444e+06	4	Forest	Validation
519	496655	4.71451e+06	5	Forest	Validation
520	498199	4.71371e+06	1	Forest	Validation
521	498282	4.71365e+06	2	Forest	Validation
522	498199	4.71362e+06	3	Forest	Validation
523	498199	4.71371e+06	4	Forest	Validation

## Sheet: 2016 - Ref.Sys. WGS84 29 North
	Coord_X	Coord_Y	Order	Habitat Class	data
1	495915	4.71412e+06	1	Sand dunes	Training
2	495999	4.7141e+06	2	Sand dunes	Training
3	495999	4.71406e+06	3	Sand dunes	Training
4	495938	4.71405e+06	4	Sand dunes	Training
5	495878	4.71408e+06	5	Sand dunes	Training
6	495915	4.71412e+06	6	Sand dunes	Training
7	496106	4.7139e+06	1	Sand dunes	Training
8	496173	4.71387e+06	2	Sand dunes	Training
9	496173	4.71385e+06	3	Sand dunes	Training
10	496173	4.71382e+06	4	Sand dunes	Training
11	496123	4.7138e+06	5	Sand dunes	Training
12	496079	4.7138e+06	6	Sand dunes	Training
13	496079	4.71387e+06	7	Sand dunes	Training
14	496106	4.7139e+06	8	Sand dunes	Training
15	496349	4.71321e+06	1	Tidal areas	Training
16	496370	4.71318e+06	2	Tidal areas	Training
17	496365	4.71316e+06	3	Tidal areas	Training
18	496359	4.71316e+06	4	Tidal areas	Training
19	496339	4.71317e+06	5	Tidal areas	Training
20	496330	4.71319e+06	6	Tidal areas	Training
21	496349	4.71321e+06	7	Tidal areas	Training
22	495728	4.71434e+06	1	Reedbed	Training
23	495766	4.71432e+06	2	Reedbed	Training
24	495766	4.7143e+06	3	Reedbed	Training
25	495759	4.7143e+06	4	Reedbed	Training
26	495734	4.7143e+06	5	Reedbed	Training
27	495691	4.7143e+06	6	Reedbed	Training
28	495728	4.71434e+06	7	Reedbed	Training
29	496055	4.71437e+06	1	Grasslands	Training
30	496126	4.71441e+06	2	Grasslands	Training
31	496137	4.7144e+06	3	Grasslands	Training
32	496137	4.71436e+06	4	Grasslands	Training
33	496131	4.71432e+06	5	Grasslands	Training
34	496114	4.71431e+06	6	Grasslands	Training
35	496055	4.71431e+06	7	Grasslands	Training
36	496055	4.71437e+06	8	Grasslands	Training
37	496427	4.71391e+06	1	Burned areas	Training
38	496511	4.71385e+06	2	Burned areas	Training
39	496498	4.71381e+06	3	Burned areas	Training
40	496474	4.71381e+06	4	Burned areas	Training
41	496415	4.71381e+06	5	Burned areas	Training
42	496414	4.71387e+06	6	Burned areas	Training
43	496427	4.71391e+06	7	Burned areas	Training
44	497082	4.71253e+06	1	Burned areas	Training
45	497155	4.71249e+06	2	Burned areas	Training
46	497155	4.71246e+06	3	Burned areas	Training
47	497152	4.71241e+06	4	Burned areas	Training
48	497134	4.71241e+06	5	Burned areas	Training
49	497075	4.71241e+06	6	Burned areas	Training
50	497055	4.71243e+06	7	Burned areas	Training
51	497049	4.71246e+06	8	Burned areas	Training
52	497082	4.71253e+06	9	Burned areas	Training
53	495515	4.71407e+06	1	Sand dunes	Training
54	495665	4.71398e+06	2	Sand dunes	Training
55	495621	4.71398e+06	3	Sand dunes	Training
56	495547	4.71401e+06	4	Sand dunes	Training
57	495504	4.71404e+06	5	Sand dunes	Training
58	495515	4.71407e+06	6	Sand dunes	Training
59	497905	4.7099e+06	1	Tidal areas	Training
60	497936	4.70989e+06	2	Tidal areas	Training
61	497928	4.70987e+06	3	Tidal areas	Training
62	497920	4.70987e+06	4	Tidal areas	Training
63	497901	4.70987e+06	5	Tidal areas	Training
64	497894	4.70988e+06	6	Tidal areas	Training
65	497894	4.70989e+06	7	Tidal areas	Training
66	497905	4.7099e+06	8	Tidal areas	Training
67	497869	4.70993e+06	1	Tidal areas	Training
68	497889	4.70992e+06	2	Tidal areas	Training
69	497885	4.70991e+06	3	Tidal areas	Training
70	497877	4.70989e+06	4	Tidal areas	Training
71	497860	4.70989e+06	5	Tidal areas	Training
72	497858	4.70989e+06	6	Tidal areas	Training
73	497860	4.70992e+06	7	Tidal areas	Training
74	497869	4.70993e+06	8	Tidal areas	Training
75	497843	4.70983e+06	1	Sand dunes	Training
76	497842	4.70986e+06	2	Sand dunes	Training
77	497877	4.70985e+06	3	Sand dunes	Training
78	497901	4.70984e+06	4	Sand dunes	Training
79	497910	4.70983e+06	5	Sand dunes	Training
80	497843	4.70983e+06	6	Sand dunes	Training
81	498032	4.70988e+06	1	Sand dunes	Training
82	498067	4.70986e+06	2	Sand dunes	Training
83	498051	4.70985e+06	3	Sand dunes	Training
84	498001	4.70985e+06	4	Sand dunes	Training
85	497989	4.70988e+06	5	Sand dunes	Training
86	498032	4.70988e+06	6	Sand dunes	Training
87	496797	4.71346e+06	1	Sea dunes	Training
88	496811	4.71337e+06	2	Sea dunes	Training
89	496756	4.71337e+06	3	Sea dunes	Training
90	496751	4.71331e+06	4	Sea dunes	Training
91	496691	4.71341e+06	5	Sea dunes	Training
92	496724	4.71343e+06	6	Sea dunes	Training
93	496743	4.71346e+06	7	Sea dunes	Training
94	496797	4.71346e+06	8	Sea dunes	Training
95	497224	4.71409e+06	1	Sea dunes	Training
96	497228	4.71407e+06	2	Sea dunes	Training
97	497208	4.71406e+06	3	Sea dunes	Training
98	497165	4.71406e+06	4	Sea dunes	Training
99	497154	4.71408e+06	5	Sea dunes	Training
100	497176	4.71409e+06	6	Sea dunes	Training
101	497224	4.71409e+06	7	Sea dunes	Training
102	496952	4.71405e+06	1	Sea dunes	Training
103	496946	4.71398e+06	2	Sea dunes	Training
104	496901	4.71398e+06	3	Sea dunes	Training
105	496860	4.71398e+06	4	Sea dunes	Training
106	496863	4.714e+06	5	Sea dunes	Training
107	496863	4.71402e+06	6	Sea dunes	Training
108	496893	4.71405e+06	7	Sea dunes	Training
109	496952	4.71405e+06	8	Sea dunes	Training
110	497158	4.7134e+06	1	Sea dunes	Training
111	497170	4.71332e+06	2	Sea dunes	Training
112	497136	4.71328e+06	3	Sea dunes	Training
113	497085	4.71329e+06	4	Sea dunes	Training
114	497085	4.71336e+06	5	Sea dunes	Training
115	497158	4.7134e+06	6	Sea dunes	Training
116	497797	4.714e+06	1	Tidal areas	Training
117	497813	4.71397e+06	2	Tidal areas	Training
118	497781	4.71393e+06	3	Tidal areas	Training
119	497706	4.71389e+06	4	Tidal areas	Training
120	497713	4.71385e+06	5	Tidal areas	Training
121	497669	4.71383e+06	6	Tidal areas	Training
122	497646	4.71387e+06	7	Tidal areas	Training
123	497635	4.71391e+06	8	Tidal areas	Training
124	497722	4.71392e+06	9	Tidal areas	Training
125	497722	4.71397e+06	10	Tidal areas	Training
126	497781	4.71397e+06	11	Tidal areas	Training
127	497797	4.714e+06	12	Tidal areas	Training
128	497505	4.71382e+06	1	Tidal areas	Training
129	497503	4.7138e+06	2	Tidal areas	Training
130	497471	4.71379e+06	3	Tidal areas	Training
131	497462	4.71374e+06	4	Tidal areas	Training
132	497423	4.71374e+06	5	Tidal areas	Training
133	497423	4.71376e+06	6	Tidal areas	Training
134	497414	4.7138e+06	7	Tidal areas	Training
135	497412	4.71382e+06	8	Tidal areas	Training
136	497505	4.71382e+06	9	Tidal areas	Training
137	497690	4.71371e+06	1	Tidal areas	Training
138	497722	4.71369e+06	2	Tidal areas	Training
139	497699	4.71365e+06	3	Tidal areas	Training
140	497637	4.71365e+06	4	Tidal areas	Training
141	497594	4.71362e+06	5	Tidal areas	Training
142	497548	4.71362e+06	6	Tidal areas	Training
143	497530	4.71362e+06	7	Tidal areas	Training
144	497564	4.71367e+06	8	Tidal areas	Training
145	497601	4.71368e+06	9	Tidal areas	Training
146	497601	4.7137e+06	10	Tidal areas	Training
147	497690	4.71371e+06	11	Tidal areas	Training
148	496824	4.71452e+06	1	Tidal areas	Training
149	496867	4.71448e+06	2	Tidal areas	Training
150	496858	4.71444e+06	3	Tidal areas	Training
151	496755	4.71443e+06	4	Tidal areas	Training
152	496751	4.7144e+06	5	Tidal areas	Training
153	496726	4.71444e+06	6	Tidal areas	Training
154	496758	4.71448e+06	7	Tidal areas	Training
155	496758	4.71451e+06	8	Tidal areas	Training
156	496824	4.71452e+06	9	Tidal areas	Training
157	496486	4.71424e+06	1	Salt marshes	Training
158	496539	4.71424e+06	2	Salt marshes	Training
159	496543	4.71421e+06	3	Salt marshes	Training
160	496598	4.71421e+06	4	Salt marshes	Training
161	496577	4.71416e+06	5	Salt marshes	Training
162	496530	4.71417e+06	6	Salt marshes	Training
163	496520	4.7142e+06	7	Salt marshes	Training
164	496486	4.71424e+06	8	Salt marshes	Training
165	497070	4.71445e+06	1	Salt marshes	Training
166	497147	4.71441e+06	2	Salt marshes	Training
167	497120	4.71435e+06	3	Salt marshes	Training
168	497120	4.71435e+06	4	Salt marshes	Training
169	497120	4.71433e+06	5	Salt marshes	Training
170	497120	4.71433e+06	6	Salt marshes	Training
171	497090	4.71433e+06	7	Salt marshes	Training
172	497068	4.71433e+06	8	Salt marshes	Training
173	497033	4.71433e+06	9	Salt marshes	Training
174	497011	4.71435e+06	10	Salt marshes	Training
175	497011	4.7144e+06	11	Salt marshes	Training
176	497070	4.71445e+06	12	Salt marshes	Training
177	497938	4.71314e+06	1	Salt marshes	Training
178	497986	4.71309e+06	2	Salt marshes	Training
179	497961	4.71304e+06	3	Salt marshes	Training
180	497931	4.71299e+06	4	Salt marshes	Training
181	497924	4.71295e+06	5	Salt marshes	Training
182	497876	4.71294e+06	6	Salt marshes	Training
183	497810	4.71294e+06	7	Salt marshes	Training
184	497810	4.71301e+06	8	Salt marshes	Training
185	497819	4.71305e+06	9	Salt marshes	Training
186	497938	4.71314e+06	10	Salt marshes	Training
187	497900	4.71004e+06	1	Burned areas	Training
188	497982	4.71002e+06	2	Burned areas	Training
189	497954	4.70999e+06	3	Burned areas	Training
190	497903	4.70999e+06	4	Burned areas	Training
191	497900	4.71004e+06	5	Burned areas	Training
192	498083	4.70999e+06	1	Burned areas	Training
193	498144	4.70995e+06	2	Burned areas	Training
194	498104	4.70993e+06	3	Burned areas	Training
195	498070	4.70996e+06	4	Burned areas	Training
196	498083	4.70999e+06	5	Burned areas	Training
197	498141	4.70983e+06	1	Grasslands	Training
198	498199	4.70982e+06	2	Grasslands	Training
199	498200	4.70977e+06	3	Grasslands	Training
200	498141	4.70979e+06	4	Grasslands	Training
201	498141	4.70983e+06	5	Grasslands	Training
202	496363	4.71341e+06	1	Grasslands	Training
203	496397	4.7134e+06	2	Grasslands	Training
204	496397	4.71328e+06	3	Grasslands	Training
205	496363	4.71328e+06	4	Grasslands	Training
206	496363	4.71341e+06	5	Grasslands	Training
207	498240	4.70979e+06	1	Grasslands	Training
208	498280	4.70975e+06	2	Grasslands	Training
209	498247	4.70975e+06	3	Grasslands	Training
210	498240	4.70979e+06	4	Grasslands	Training
211	497697	4.71061e+06	1	Forest	Training
212	497726	4.71049e+06	2	Forest	Training
213	497695	4.71049e+06	3	Forest	Training
214	497697	4.71061e+06	4	Forest	Training
215	497819	4.71163e+06	1	Forest	Training
216	497930	4.71156e+06	2	Forest	Training
217	497935	4.71153e+06	3	Forest	Training
218	497885	4.7115e+06	4	Forest	Training
219	497804	4.7115e+06	5	Forest	Training
220	497776	4.71155e+06	6	Forest	Training
221	497819	4.71163e+06	7	Forest	Training
222	495882	4.71483e+06	1	Reedbed	Training
223	495926	4.71476e+06	2	Reedbed	Training
224	495912	4.71474e+06	3	Reedbed	Training
225	495855	4.71474e+06	4	Reedbed	Training
226	495836	4.71476e+06	5	Reedbed	Training
227	495836	4.71483e+06	6	Reedbed	Training
228	495882	4.71483e+06	7	Reedbed	Training
229	496578	4.71469e+06	1	Reedbed	Training
230	496603	4.71466e+06	2	Reedbed	Training
231	496634	4.71466e+06	3	Reedbed	Training
232	496638	4.7146e+06	4	Reedbed	Training
233	496578	4.7146e+06	5	Reedbed	Training
234	496578	4.71469e+06	6	Reedbed	Training
235	496456	4.71466e+06	1	Tidal areas	Training
236	496454	4.71463e+06	2	Tidal areas	Training
237	496485	4.71463e+06	3	Tidal areas	Training
238	496486	4.71461e+06	4	Tidal areas	Training
239	496454	4.7146e+06	5	Tidal areas	Training
240	496453	4.71455e+06	6	Tidal areas	Training
241	496401	4.71455e+06	7	Tidal areas	Training
242	496396	4.71458e+06	8	Tidal areas	Training
243	496426	4.71463e+06	9	Tidal areas	Training
244	496427	4.71466e+06	10	Tidal areas	Training
245	496456	4.71466e+06	11	Tidal areas	Training
246	498018	4.71397e+06	1	Reedbed	Training
247	498071	4.71397e+06	2	Reedbed	Training
248	498071	4.71395e+06	3	Reedbed	Training
249	498018	4.71395e+06	4	Reedbed	Training
250	498018	4.71397e+06	5	Reedbed	Training
251	498052	4.71391e+06	1	Sea dunes	Training
252	498132	4.71391e+06	2	Sea dunes	Training
253	498136	4.71386e+06	3	Sea dunes	Training
254	498052	4.71386e+06	4	Sea dunes	Training
255	498052	4.71391e+06	5	Sea dunes	Training
256	498216	4.71397e+06	1	Forest	Training
257	498212	4.71389e+06	2	Forest	Training
258	498175	4.71389e+06	3	Forest	Training
259	498176	4.71397e+06	4	Forest	Training
260	498216	4.71397e+06	5	Forest	Training
261	497063	4.71403e+06	1	Forest	Training
262	497105	4.71399e+06	2	Forest	Training
263	497045	4.71399e+06	3	Forest	Training
264	497063	4.71403e+06	4	Forest	Training
265	497349	4.7141e+06	1	Grasslands	Training
266	497349	4.71405e+06	2	Grasslands	Training
267	497299	4.71405e+06	3	Grasslands	Training
268	497299	4.7141e+06	4	Grasslands	Training
269	497349	4.7141e+06	5	Grasslands	Training
270	496343	4.71407e+06	1	Forest	Training
271	496422	4.71395e+06	2	Forest	Training
272	496333	4.71395e+06	3	Forest	Training
273	496343	4.71407e+06	4	Forest	Training
274	496306	4.71358e+06	1	Forest	Training
275	496305	4.71361e+06	2	Forest	Training
276	496336	4.71365e+06	3	Forest	Training
277	496395	4.71364e+06	4	Forest	Training
278	496394	4.71362e+06	5	Forest	Training
279	496363	4.71361e+06	6	Forest	Training
280	496336	4.71361e+06	7	Forest	Training
281	496335	4.71357e+06	8	Forest	Training
282	496334	4.71357e+06	9	Forest	Training
283	496306	4.71358e+06	10	Forest	Training
284	497356	4.7137e+06	1	Forest	Training
285	497390	4.71365e+06	2	Forest	Training
286	497325	4.71365e+06	3	Forest	Training
287	497325	4.71367e+06	4	Forest	Training
288	497356	4.71368e+06	5	Forest	Training
289	497356	4.7137e+06	6	Forest	Training
290	497956	4.71133e+06	1	Salt marshes	Training
291	497984	4.71131e+06	2	Salt marshes	Training
292	498015	4.7113e+06	3	Salt marshes	Training
293	498018	4.71128e+06	4	Salt marshes	Training
294	497956	4.71127e+06	5	Salt marshes	Training
295	497955	4.71125e+06	6	Salt marshes	Training
296	497927	4.71125e+06	7	Salt marshes	Training
297	497925	4.7113e+06	8	Salt marshes	Training
298	497956	4.7113e+06	9	Salt marshes	Training
299	497956	4.71133e+06	10	Salt marshes	Training
300	497836	4.71109e+06	1	Salt marshes	Training
301	497865	4.71109e+06	2	Salt marshes	Training
302	497858	4.71104e+06	3	Salt marshes	Training
303	497891	4.71103e+06	4	Salt marshes	Training
304	497891	4.71101e+06	5	Salt marshes	Training
305	497838	4.71101e+06	6	Salt marshes	Training
306	497836	4.71109e+06	7	Salt marshes	Training
307	497865	4.71097e+06	1	Sea dunes	Training
308	497893	4.71097e+06	2	Sea dunes	Training
309	497900	4.71086e+06	3	Sea dunes	Training
310	497865	4.71086e+06	4	Sea dunes	Training
311	497865	4.71091e+06	5	Sea dunes	Training
312	497865	4.71097e+06	6	Sea dunes	Training
313	497416	4.71151e+06	1	Tidal areas	Training
314	497462	4.71143e+06	2	Tidal areas	Training
315	497445	4.71136e+06	3	Tidal areas	Training
316	497414	4.71143e+06	4	Tidal areas	Training
317	497416	4.71151e+06	5	Tidal areas	Training
318	496247	4.71346e+06	1	Burned areas	Training
319	496333	4.71346e+06	2	Burned areas	Training
320	496333	4.71344e+06	3	Burned areas	Training
321	496247	4.71344e+06	4	Burned areas	Training
322	496247	4.71346e+06	5	Burned areas	Training
323	496126	4.71325e+06	1	Burned areas	Training
324	496210	4.71325e+06	2	Burned areas	Training
325	496209	4.7132e+06	3	Burned areas	Training
326	496127	4.7132e+06	4	Burned areas	Training
327	496126	4.71325e+06	5	Burned areas	Training
328	497879	4.70993e+06	1	Tidal areas	Validation
329	497981	4.70989e+06	2	Tidal areas	Validation
330	497936	4.7099e+06	3	Tidal areas	Validation
331	497901	4.70991e+06	4	Tidal areas	Validation
332	497890	4.70992e+06	5	Tidal areas	Validation
333	497879	4.70993e+06	6	Tidal areas	Validation
334	497879	4.70987e+06	1	Tidal areas	Validation
335	497903	4.70987e+06	2	Tidal areas	Validation
336	497896	4.70986e+06	3	Tidal areas	Validation
337	497879	4.70986e+06	4	Tidal areas	Validation
338	497879	4.70987e+06	5	Tidal areas	Validation
339	497845	4.70982e+06	1	Sea dunes	Validation
340	497869	4.70982e+06	2	Sea dunes	Validation
341	497864	4.70981e+06	3	Sea dunes	Validation
342	497843	4.70981e+06	4	Sea dunes	Validation
343	497845	4.70982e+06	5	Sea dunes	Validation
344	497962	4.70988e+06	1	Grasslands	Validation
345	497993	4.70986e+06	2	Grasslands	Validation
346	497962	4.70986e+06	3	Grasslands	Validation
347	497962	4.70988e+06	4	Grasslands	Validation
348	496458	4.71328e+06	1	Forest	Validation
349	496541	4.71326e+06	2	Forest	Validation
350	496635	4.71328e+06	3	Forest	Validation
351	496611	4.71323e+06	4	Forest	Validation
352	496558	4.7132e+06	5	Forest	Validation
353	496486	4.71324e+06	6	Forest	Validation
354	496458	4.71328e+06	7	Forest	Validation
355	496183	4.71338e+06	1	Reedbed	Validation
356	496234	4.71331e+06	2	Reedbed	Validation
357	496165	4.71328e+06	3	Reedbed	Validation
358	496144	4.71331e+06	4	Reedbed	Validation
359	496183	4.71338e+06	5	Reedbed	Validation
360	495805	4.7142e+06	1	Reedbed	Validation
361	495864	4.71418e+06	2	Reedbed	Validation
362	495862	4.71416e+06	3	Reedbed	Validation
363	495837	4.71415e+06	4	Reedbed	Validation
364	495805	4.71417e+06	5	Reedbed	Validation
365	495805	4.7142e+06	6	Reedbed	Validation
366	495967	4.714e+06	1	Reedbed	Validation
367	496036	4.71397e+06	2	Reedbed	Validation
368	496024	4.71394e+06	3	Reedbed	Validation
369	495963	4.71394e+06	4	Reedbed	Validation
370	495967	4.714e+06	5	Reedbed	Validation
371	496161	4.71378e+06	1	Reedbed	Validation
372	496241	4.71379e+06	2	Reedbed	Validation
373	496244	4.71372e+06	3	Reedbed	Validation
374	496163	4.71372e+06	4	Reedbed	Validation
375	496161	4.71378e+06	5	Reedbed	Validation
376	495752	4.71437e+06	1	Reedbed	Validation
377	495810	4.71434e+06	2	Reedbed	Validation
378	495754	4.71435e+06	3	Reedbed	Validation
379	495752	4.71437e+06	4	Reedbed	Validation
380	496474	4.71303e+06	1	Tidal areas	Validation
381	496535	4.713e+06	2	Tidal areas	Validation
382	496502	4.71298e+06	3	Tidal areas	Validation
383	496474	4.71303e+06	4	Tidal areas	Validation
384	496040	4.71444e+06	1	Tidal areas	Validation
385	496096	4.71442e+06	2	Tidal areas	Validation
386	496096	4.71436e+06	3	Tidal areas	Validation
387	496049	4.71435e+06	4	Tidal areas	Validation
388	496040	4.71444e+06	5	Tidal areas	Validation
389	496436	4.71401e+06	1	Tidal areas	Validation
390	496466	4.71392e+06	2	Tidal areas	Validation
391	496419	4.71391e+06	3	Tidal areas	Validation
392	496436	4.71401e+06	4	Tidal areas	Validation
393	496596	4.71379e+06	1	Tidal areas	Validation
394	496658	4.71375e+06	2	Tidal areas	Validation
395	496639	4.71373e+06	3	Tidal areas	Validation
396	496596	4.71373e+06	4	Tidal areas	Validation
397	496596	4.71379e+06	5	Tidal areas	Validation
398	497198	4.71235e+06	1	Sand dunes	Validation
399	497249	4.7123e+06	2	Sand dunes	Validation
400	497249	4.71227e+06	3	Sand dunes	Validation
401	497202	4.71227e+06	4	Sand dunes	Validation
402	497182	4.7123e+06	5	Sand dunes	Validation
403	497198	4.71235e+06	6	Sand dunes	Validation
404	497704	4.71069e+06	1	Sand dunes	Validation
405	497714	4.71064e+06	2	Sand dunes	Validation
406	497688	4.71066e+06	3	Sand dunes	Validation
407	497704	4.71069e+06	4	Sand dunes	Validation
408	498100	4.71047e+06	1	Sand dunes	Validation
409	498147	4.71042e+06	2	Sand dunes	Validation
410	498103	4.71042e+06	3	Sand dunes	Validation
411	498097	4.71044e+06	4	Sand dunes	Validation
412	498100	4.71047e+06	5	Sand dunes	Validation
413	498066	4.71087e+06	1	Sand dunes	Validation
414	498095	4.71084e+06	2	Sand dunes	Validation
415	498045	4.71075e+06	3	Sand dunes	Validation
416	498011	4.71077e+06	4	Sand dunes	Validation
417	498066	4.71087e+06	5	Sand dunes	Validation
418	497969	4.71015e+06	1	Sand dunes	Validation
419	498014	4.71017e+06	2	Sand dunes	Validation
420	498003	4.71012e+06	3	Sand dunes	Validation
421	497969	4.71015e+06	4	Sand dunes	Validation
422	497814	4.71234e+06	1	Sea dunes	Validation
423	497834	4.71229e+06	2	Sea dunes	Validation
424	497808	4.71229e+06	3	Sea dunes	Validation
425	497814	4.71234e+06	4	Sea dunes	Validation
426	497793	4.71373e+06	1	Sea dunes	Validation
427	497793	4.71367e+06	2	Sea dunes	Validation
428	497751	4.71367e+06	3	Sea dunes	Validation
429	497751	4.7137e+06	4	Sea dunes	Validation
430	497793	4.71373e+06	5	Sea dunes	Validation
431	498633	4.71393e+06	1	Sea dunes	Validation
432	498706	4.71388e+06	2	Sea dunes	Validation
433	498633	4.71387e+06	3	Sea dunes	Validation
434	498633	4.71393e+06	4	Sea dunes	Validation
435	496907	4.71461e+06	1	Sea dunes	Validation
436	496927	4.71457e+06	2	Sea dunes	Validation
437	496872	4.71451e+06	3	Sea dunes	Validation
438	496872	4.71455e+06	4	Sea dunes	Validation
439	496907	4.71461e+06	5	Sea dunes	Validation
440	496692	4.71474e+06	1	Grasslands	Validation
441	496715	4.71472e+06	2	Grasslands	Validation
442	496680	4.71469e+06	3	Grasslands	Validation
443	496692	4.71474e+06	4	Grasslands	Validation
444	497948	4.71432e+06	1	Grasslands	Validation
445	497969	4.71431e+06	2	Grasslands	Validation
446	497938	4.71426e+06	3	Grasslands	Validation
447	497872	4.71425e+06	4	Grasslands	Validation
448	497865	4.71429e+06	5	Grasslands	Validation
449	497903	4.71429e+06	6	Grasslands	Validation
450	497917	4.71432e+06	7	Grasslands	Validation
451	497948	4.71432e+06	8	Grasslands	Validation
452	497538	4.71385e+06	1	Grasslands	Validation
453	497570	4.71381e+06	2	Grasslands	Validation
454	497536	4.71381e+06	3	Grasslands	Validation
455	497538	4.71385e+06	4	Grasslands	Validation
456	497827	4.71401e+06	1	Grasslands	Validation
457	497873	4.71397e+06	2	Grasslands	Validation
458	497832	4.71397e+06	3	Grasslands	Validation
459	497827	4.71401e+06	4	Grasslands	Validation
460	497397	4.71373e+06	1	Grasslands	Validation
461	497391	4.71367e+06	2	Grasslands	Validation
462	497371	4.71371e+06	3	Grasslands	Validation
463	497397	4.71373e+06	4	Grasslands	Validation
464	498036	4.71137e+06	1	Grasslands	Validation
465	498059	4.71132e+06	2	Grasslands	Validation
466	497990	4.71134e+06	3	Grasslands	Validation
467	498036	4.71137e+06	4	Grasslands	Validation
468	497820	4.71106e+06	1	Grasslands	Validation
469	497840	4.71099e+06	2	Grasslands	Validation
470	497765	4.71101e+06	3	Grasslands	Validation
471	497820	4.71106e+06	4	Grasslands	Validation
472	497928	4.71343e+06	1	Grasslands	Validation
473	497960	4.71336e+06	2	Grasslands	Validation
474	497902	4.71336e+06	3	Grasslands	Validation
475	497877	4.71341e+06	4	Grasslands	Validation
476	497928	4.71343e+06	5	Grasslands	Validation
477	497932	4.71295e+06	1	Burned areas	Validation
478	497961	4.71287e+06	2	Burned areas	Validation
479	497926	4.71291e+06	3	Burned areas	Validation
480	497932	4.71295e+06	4	Burned areas	Validation
481	497736	4.71325e+06	1	Burned areas	Validation
482	497789	4.71319e+06	2	Burned areas	Validation
483	497691	4.71319e+06	3	Burned areas	Validation
484	497736	4.71325e+06	4	Burned areas	Validation
485	498015	4.71318e+06	1	Burned areas	Validation
486	498060	4.71314e+06	2	Burned areas	Validation
487	497991	4.7131e+06	3	Burned areas	Validation
488	498015	4.71318e+06	4	Burned areas	Validation
489	495795	4.71484e+06	1	Burned areas	Validation
490	495803	4.71473e+06	2	Burned areas	Validation
491	495774	4.71476e+06	3	Burned areas	Validation
492	495772	4.71479e+06	4	Burned areas	Validation
493	495795	4.71484e+06	5	Burned areas	Validation
494	495771	4.71499e+06	1	Burned areas	Validation
495	495764	4.71494e+06	2	Burned areas	Validation
496	495736	4.71496e+06	3	Burned areas	Validation
497	495771	4.71499e+06	4	Burned areas	Validation
498	497900	4.71221e+06	1	Forest	Validation
499	497971	4.71218e+06	2	Forest	Validation
500	497954	4.71217e+06	3	Forest	Validation
501	497939	4.71213e+06	4	Forest	Validation
502	497892	4.71212e+06	5	Forest	Validation
503	497881	4.71217e+06	6	Forest	Validation
504	497900	4.71221e+06	7	Forest	Validation
505	498203	4.71219e+06	1	Forest	Validation
506	498224	4.71215e+06	2	Forest	Validation
507	498190	4.71215e+06	3	Forest	Validation
508	498203	4.71219e+06	4	Forest	Validation
509	497300	4.71417e+06	1	Forest	Validation
510	497343	4.71413e+06	2	Forest	Validation
511	497278	4.71413e+06	3	Forest	Validation
512	497300	4.71417e+06	4	Forest	Validation
513	497192	4.71395e+06	1	Forest	Validation
514	497216	4.71393e+06	2	Forest	Validation
515	497200	4.71389e+06	3	Forest	Validation
516	497162	4.71392e+06	4	Forest	Validation
517	497192	4.71395e+06	5	Forest	Validation
518	497249	4.71374e+06	1	Forest	Validation
519	497307	4.71374e+06	2	Forest	Validation
520	497217	4.71369e+06	3	Forest	Validation
521	497249	4.71374e+06	4	Forest	Validation
522	496905	4.71393e+06	1	Forest	Validation
523	496949	4.71391e+06	2	Forest	Validation
524	496905	4.7139e+06	3	Forest	Validation
525	496905	4.71393e+06	4	Forest	Validation
526	497341	4.714e+06	1	Forest	Validation
527	497394	4.714e+06	2	Forest	Validation
528	497358	4.71396e+06	3	Forest	Validation
529	497341	4.714e+06	4	Forest	Validation
530	497314	4.71383e+06	1	Salt marshes	Validation
531	497364	4.71378e+06	2	Salt marshes	Validation
532	497301	4.71378e+06	3	Salt marshes	Validation
533	497314	4.71383e+06	4	Salt marshes	Validation
534	498041	4.71001e+06	1	Salt marshes	Validation
535	498054	4.70998e+06	2	Salt marshes	Validation
536	497998	4.70995e+06	3	Salt marshes	Validation
537	497958	4.70997e+06	4	Salt marshes	Validation
538	498041	4.71001e+06	5	Salt marshes	Validation
539	498137	4.70989e+06	1	Salt marshes	Validation
540	498164	4.70989e+06	2	Salt marshes	Validation
541	498168	4.70984e+06	3	Salt marshes	Validation
542	498136	4.70984e+06	4	Salt marshes	Validation
543	498137	4.70989e+06	5	Salt marshes	Validation
544	498213	4.70981e+06	1	Salt marshes	Validation
545	498243	4.70981e+06	2	Salt marshes	Validation
546	498208	4.70976e+06	3	Salt marshes	Validation
547	498213	4.70981e+06	4	Salt marshes	Validation
548	498079	4.70982e+06	1	Salt marshes	Validation
549	498126	4.70981e+06	2	Salt marshes	Validation
550	498123	4.70979e+06	3	Salt marshes	Validation
551	498065	4.70981e+06	4	Salt marshes	Validation
552	498079	4.70982e+06	5	Salt marshes	Validation
553	497979	4.70983e+06	1	Salt marshes	Validation
554	498040	4.7098e+06	2	Salt marshes	Validation
555	497984	4.70981e+06	3	Salt marshes	Validation
556	497979	4.70983e+06	4	Salt marshes	Validation
557	498228	4.70974e+06	1	Reedbed	Validation
558	498285	4.70974e+06	2	Reedbed	Validation
559	498235	4.70972e+06	3	Reedbed	Validation
560	498228	4.70974e+06	4	Reedbed	Validation
